# Supplementary material for: Effect of Monthly, High‐Dose, Long‐Term Vitamin D Supplementation on Central Blood Pressure Parameters: A Randomized Controlled Trial Substudy
Source: PubMed Central journal article supplement (PMC5721873; doi:10.1161/jaha.117.006802), 2017-10-24
Supplement: JAH3-6-e006802-s001.pdf [file JAH3-6-e006802-s001.pdf]

# **Supplemental Material**

**Table S1.** Antihypertensive medication regimens in the total sample; n=517<sup>1</sup>

| Antihypertensive regimen                | n               |            |               |            |
|-----------------------------------------|-----------------|------------|---------------|------------|
|                                         | Vitamin D group |            | Placebo group |            |
|                                         | Baseline        | Follow-up  | Baseline      | Follow-up  |
| <b>0 drugs</b>                          | <b>160</b>      | <b>154</b> | <b>171</b>    | <b>167</b> |
| <b>1 drug</b>                           | <b>45</b>       | <b>48</b>  | <b>32</b>     | <b>36</b>  |
| ACEI                                    | 22              | 17         | 15            | 14         |
| $\alpha$ B                              | 1               | 4          | 0             | 1          |
| ARB                                     | 4               | 5          | 5             | 4          |
| $\beta$ B                               | 5               | 4          | 4             | 6          |
| CCB                                     | 7               | 11         | 6             | 8          |
| D                                       | 6               | 7          | 2             | 3          |
| <b>2 drugs</b>                          | <b>31</b>       | <b>36</b>  | <b>36</b>     | <b>32</b>  |
| ACEI + $\alpha$ B                       | 0               | 0          | 1             | 2          |
| ACEI + ARB                              | 0               | 1          | 0             | 0          |
| ACEI + $\beta$ B                        | 4               | 5          | 7             | 6          |
| ACEI + CCB                              | 2               | 5          | 6             | 5          |
| ACEI + D                                | 10              | 12         | 10            | 9          |
| $\alpha$ B + ARB                        | 0               | 1          | 0             | 0          |
| $\alpha$ B + $\beta$ B                  | 1               | 0          | 0             | 0          |
| $\alpha$ B + CCB                        | 1               | 0          | 0             | 0          |
| ARB + $\beta$ B                         | 1               | 2          | 2             | 0          |
| ARB + CCB                               | 0               | 1          | 1             | 1          |
| ARB + D                                 | 2               | 1          | 0             | 0          |
| $\beta$ B + CCB                         | 3               | 2          | 2             | 3          |
| $\beta$ B + D                           | 3               | 2          | 5             | 4          |
| CCB + D                                 | 4               | 4          | 2             | 2          |
| <b>3 drugs</b>                          | <b>17</b>       | <b>14</b>  | <b>19</b>     | <b>19</b>  |
| ACEI + $\alpha$ B + $\beta$ B           | 1               | 2          | 1             | 2          |
| ACEI + $\alpha$ B + CCB                 | 1               | 1          | 1             | 1          |
| ACEI + ARB + D                          | 0               | 0          | 1             | 0          |
| ACEI + $\beta$ B + CCB                  | 2               | 1          | 1             | 0          |
| ACEI + $\beta$ B + D                    | 3               | 2          | 4             | 4          |
| ACEI + CCB + D                          | 5               | 5          | 5             | 5          |
| $\alpha$ B + ARB + $\beta$ B            | 1               | 0          | 0             | 1          |
| $\alpha$ B + $\beta$ B + CCB            | 1               | 1          | 0             | 0          |
| $\alpha$ B + CCB + D                    | 0               | 0          | 1             | 1          |
| ARB + $\beta$ B + CCB                   | 2               | 1          | 0             | 0          |
| ARB + $\beta$ B + D                     | 0               | 0          | 2             | 3          |
| ARB + CCB + D                           | 0               | 0          | 1             | 2          |
| $\beta$ B + CCB + D                     | 1               | 1          | 2             | 0          |
| <b>4 drugs</b>                          | <b>2</b>        | <b>3</b>   | <b>3</b>      | <b>7</b>   |
| ACEI + $\alpha$ B + $\beta$ B + CCB     | 0               | 1          | 0             | 0          |
| ACEI + $\alpha$ B + CCB + D             | 1               | 2          | 1             | 1          |
| ACEI + $\beta$ B + CCB + D              | 1               | 0          | 0             | 2          |
| $\alpha$ B + ARB + $\beta$ B + D        | 0               | 0          | 0             | 1          |
| $\alpha$ B + ARB + CCB + D              | 0               | 0          | 1             | 2          |
| ARB + $\beta$ B + CCB + D               | 0               | 0          | 1             | 1          |
| <b>5 drugs</b>                          | <b>1</b>        | <b>1</b>   | <b>0</b>      | <b>0</b>   |
| ACEI + $\alpha$ B + $\beta$ B + CCB + D | 1               | 1          | 0             | 0          |
| <b>All drugs</b>                        | <b>96</b>       | <b>102</b> | <b>90</b>     | <b>94</b>  |

ACE=ACE inhibitor;  $\alpha$ B=Alpha blocker; ARB=Angiotensin receptor blocker;  $\beta$ B=Beta blocker; CCB=Calcium channel blocker; D=Diuretic.

**Table S2.** Antihypertensive medication regimens in the vitamin D-deficient sample; n=150<sup>1</sup>

| Antihypertensive regimen                | n               |           |               |           |
|-----------------------------------------|-----------------|-----------|---------------|-----------|
|                                         | Vitamin D group |           | Placebo group |           |
|                                         | Baseline        | Follow-up | Baseline      | Follow-up |
| <b>0 drugs</b>                          | <b>43</b>       | <b>40</b> | <b>39</b>     | <b>35</b> |
| <b>1 drug</b>                           | <b>15</b>       | <b>13</b> | <b>11</b>     | <b>19</b> |
| ACEI                                    | 7               | 5         | 5             | 8         |
| $\alpha$ B                              | 1               | 1         | 0             | 0         |
| ARB                                     | 0               | 1         | 1             | 2         |
| $\beta$ B                               | 2               | 1         | 1             | 3         |
| CCB                                     | 2               | 3         | 3             | 5         |
| D                                       | 3               | 2         | 1             | 1         |
| <b>2 drugs</b>                          | <b>7</b>        | <b>12</b> | <b>18</b>     | <b>16</b> |
| ACEI + $\alpha$ B                       | 0               | 0         | 0             | 0         |
| ACEI + ARB                              | 0               | 0         | 0             | 0         |
| ACEI + $\beta$ B                        | 0               | 1         | 2             | 2         |
| ACEI + CCB                              | 0               | 3         | 5             | 4         |
| ACEI + D                                | 2               | 3         | 7             | 5         |
| $\alpha$ B + ARB                        | 0               | 0         | 0             | 0         |
| $\alpha$ B + $\beta$ B                  | 0               | 0         | 0             | 0         |
| $\alpha$ B + CCB                        | 1               | 0         | 0             | 0         |
| ARB + $\beta$ B                         | 0               | 1         | 0             | 0         |
| ARB + CCB                               | 0               | 1         | 1             | 1         |
| ARB + D                                 | 1               | 1         | 0             | 0         |
| $\beta$ B + CCB                         | 1               | 0         | 0             | 1         |
| $\beta$ B + D                           | 1               | 1         | 2             | 2         |
| CCB + D                                 | 1               | 1         | 1             | 1         |
| <b>3 drugs</b>                          | <b>6</b>        | <b>5</b>  | <b>8</b>      | <b>6</b>  |
| ACEI + $\alpha$ B + $\beta$ B           | 0               | 0         | 0             | 1         |
| ACEI + $\alpha$ B + CCB                 | 0               | 0         | 1             | 1         |
| ACEI + ARB + D                          | 0               | 0         | 0             | 0         |
| ACEI + $\beta$ B + CCB                  | 1               | 0         | 0             | 0         |
| ACEI + $\beta$ B + D                    | 1               | 1         | 3             | 1         |
| ACEI + CCB + D                          | 2               | 3         | 1             | 1         |
| $\alpha$ B + ARB + $\beta$ B            | 1               | 0         | 0             | 0         |
| $\alpha$ B + $\beta$ B + CCB            | 1               | 1         | 0             | 0         |
| $\alpha$ B + CCB + D                    | 0               | 0         | 0             | 0         |
| ARB + $\beta$ B + CCB                   | 0               | 0         | 0             | 0         |
| ARB + $\beta$ B + D                     | 0               | 0         | 0             | 1         |
| ARB + CCB + D                           | 0               | 0         | 1             | 1         |
| $\beta$ B + CCB + D                     | 0               | 0         | 2             | 0         |
| <b>4 drugs</b>                          | <b>0</b>        | <b>1</b>  | <b>3</b>      | <b>3</b>  |
| ACEI + $\alpha$ B + $\beta$ B + CCB     | 0               | 1         | 0             | 0         |
| ACEI + $\alpha$ B + CCB + D             | 0               | 0         | 1             | 1         |
| ACEI + $\beta$ B + CCB + D              | 0               | 0         | 0             | 1         |
| $\alpha$ B + ARB + $\beta$ B + D        | 0               | 0         | 0             | 0         |
| $\alpha$ B + ARB + CCB + D              | 0               | 0         | 1             | 1         |
| ARB + $\beta$ B + CCB + D               | 0               | 0         | 1             | 0         |
| <b>5 drugs</b>                          | <b>0</b>        | <b>0</b>  | <b>0</b>      | <b>0</b>  |
| ACEI + $\alpha$ B + $\beta$ B + CCB + D | 0               | 0         | 0             | 0         |
| <b>All drugs</b>                        | <b>28</b>       | <b>31</b> | <b>40</b>     | <b>44</b> |

ACE=ACE inhibitor;  $\alpha$ B=Alpha blocker; ARB=Angiotensin receptor blocker;  $\beta$ B=Beta blocker; CCB=Calcium channel blocker; D=Diuretic.

**Table S3.** Eigenvalues of the correlation matrix and loadings in the factor analysis (varimax solution) for change (follow-up minus baseline) in arterial waveform parameters among those with baseline vitamin D deficiency (deseasonalised 25(OH) <50 nmol/L)

|                                    |                                            | Factor*      |               |              |              |
|------------------------------------|--------------------------------------------|--------------|---------------|--------------|--------------|
|                                    |                                            | Factor 1     | Factor 2      | Factor 3     | Factor 4     |
| Eigenvalues of the matrix          | Eigenvalue                                 | 7.422        | 2.361         | 1.651        | 1.093        |
|                                    | Proportion of total variance               | 0.530        | 0.169         | 0.118        | 0.078        |
| <i>Arterial waveform parameter</i> |                                            |              |               |              |              |
| Loading (correlation coefficient)  | Pulse rate                                 | 0.019        | <b>-0.930</b> | -0.093       | 0.032        |
|                                    | Brachial SBP                               | <b>0.949</b> | 0.118         | 0.182        | 0.129        |
|                                    | Brachial DBP                               | <b>0.830</b> | -0.023        | -0.064       | 0.038        |
|                                    | Aortic SBP                                 | <b>0.930</b> | 0.197         | 0.245        | 0.121        |
|                                    | Aortic DBP                                 | <b>0.911</b> | -0.196        | -0.047       | 0.049        |
|                                    | Augmentation index                         | 0.058        | <b>0.768</b>  | 0.135        | 0.187        |
|                                    | Pulse wave velocity                        | <b>0.926</b> | 0.142         | 0.219        | -0.111       |
|                                    | Peak reservoir pressure                    | <b>0.941</b> | 0.265         | -0.062       | 0.123        |
|                                    | Peak excess pressure                       | 0.123        | -0.001        | <b>0.976</b> | -0.049       |
|                                    | Reservoir pressure integral                | <b>0.565</b> | <b>0.770</b>  | 0.031        | 0.105        |
|                                    | log <sub>e</sub> (excess pressure integral | 0.115        | 0.262         | <b>0.919</b> | 0.119        |
|                                    | Backward pressure amplitude                | <b>0.680</b> | <b>0.412</b>  | 0.281        | <b>0.443</b> |
|                                    | Forward pressure amplitude                 | <b>0.812</b> | 0.248         | <b>0.337</b> | -0.207       |
|                                    | log <sub>e</sub> (wave reflection index)   | 0.043        | 0.137         | 0.018        | <b>0.971</b> |

\*Factors > 0.3 are in bold, which indicates that the variable can be considered a significant constituent of that factor.

**Table S4.** Changes (follow-up minus baseline) in factor analysis variables (adjusted for age, sex and ethnicity) by treatment group among those with baseline vitamin D deficiency (deseasonalised 25(OH) <50 nmol/L)

| Factor*  | Mean (standard deviation)<br>change from baseline |                         | Change from baseline,<br>vitamin D minus placebo |                      |
|----------|---------------------------------------------------|-------------------------|--------------------------------------------------|----------------------|
|          | Vitamin D group<br>(n=71)                         | Placebo group<br>(n=79) | Mean<br>(95% confidence interval)                | P-value <sup>†</sup> |
| Factor 1 | -0.30 (1.00)                                      | 0.22 (1.00)             | -0.52 (-0.94, -0.11)                             | <b>0.01</b>          |
| Factor 2 | -0.35 (1.00)                                      | 0.10 (1.00)             | -0.45 (-0.87, -0.04)                             | <b>0.03</b>          |
| Factor 3 | 0.01 (1.00)                                       | -0.24 (1.00)            | 0.25 (-0.16, 0.67)                               | 0.23                 |
| Factor 4 | 0.02 (1.00)                                       | 0.11 (1.00)             | -0.09 (-0.50, 0.33)                              | 0.67                 |

\*Described in Table S3.

<sup>†</sup>Analysis of covariance.

**Table S5.** Arterial function measures at baseline and follow-up (adjusted for age, sex and ethnicity) by treatment group among those without baseline vitamin D deficiency (deseasonalized 25(OH)  $\geq$ 50 nmol/L); n=367

| Variable                                                      | Mean (standard deviation)  |               |                          |               | Change from baseline, vitamin D minus placebo |         |
|---------------------------------------------------------------|----------------------------|---------------|--------------------------|---------------|-----------------------------------------------|---------|
|                                                               | Vitamin D group<br>(n=185) |               | Placebo group<br>(n=182) |               | Mean (95% CI)                                 | P-value |
|                                                               | Baseline                   | Follow-up     | Baseline                 | Follow-up     |                                               |         |
| Pulse rate (beats/minute)                                     | 63.2 (9.6)                 | 66.0 (9.4)    | 63.2 (9.5)               | 66.2 (11.4)   | -0.1 (-2.0, 1.8)                              | 0.89    |
| Brachial SBP (mmHg)                                           | 138.9 (19.0)               | 131.0 (16.9)  | 138.1 (16.0)             | 131.3 (18.3)  | -1.1 (-4.5, 2.4)                              | 0.54    |
| Brachial DBP (mmHg)                                           | 78.4 (10.5)                | 74.1 (10.1)   | 78.4 (8.9)               | 74.2 (9.4)    | -0.2 (-2.1, 1.7)                              | 0.85    |
| Aortic SBP (mmHg)                                             | 141.1 (18.4)               | 133.3 (16.7)  | 140.1 (17.4)             | 132.7 (19.5)  | -0.4 (-3.9, 3.1)                              | 0.82    |
| Aortic DBP (mmHg)                                             | 72.2 (6.7)                 | 70.0 (6.3)    | 72.1 (5.4)               | 70.0 (5.9)    | -0.2 (-1.4, 1.1)                              | 0.79    |
| Augmentation index (%)                                        | 31.5 (11.5)                | 29.4 (11.6)   | 31.6 (12.8)              | 27.6 (11.8)   | 2.0 (-0.8, 4.7)                               | 0.16    |
| Pulse wave velocity (m/s)                                     | 9.4 (1.6)                  | 9.3 (1.6)     | 9.4 (1.7)                | 9.3 (1.8)     | -0.0 (-0.2, 0.1)                              | 0.81    |
| Peak reservoir pressure (mmHg)                                | 124.9 (17.7)               | 118.8 (15.7)  | 125.0 (15.7)             | 118.6 (17.6)  | 0.2 (-3.2, 3.7)                               | 0.90    |
| Peak excess pressure (mmHg)                                   | 29.0 (8.8)                 | 25.6 (7.8)    | 27.6 (8.4)               | 25.4 (8.5)    | -1.2 (-3.2, 0.8)                              | 0.23    |
| Reservoir pressure integral (mmHg.s)                          | 91.7 (18.0)                | 83.2 (16.8)   | 92.2 (20.8)              | 84.1 (20.9)   | -0.2 (-4.1, 3.6)                              | 0.91    |
| log <sub>e</sub> (excess pressure integral (mmHg.s))          | 1.59 (0.38)                | 1.40 (0.41)   | 1.53 (0.43)              | 1.35 (0.43)   | -0.01 (-0.11, 0.08)                           | 0.77    |
| Backward pressure amplitude (mmHg)                            | 29.0 (7.1)                 | 26.2 (6.4)    | 29.0 (7.4)               | 26.0 (7.9)    | 0.2 (-1.2, 1.6)                               | 0.77    |
| Forward pressure amplitude (mmHg)                             | 40.3 (8.2)                 | 37.6 (8.2)    | 39.5 (8.4)               | 37.3 (9.5)    | -0.5 (-2.3, 1.3)                              | 0.58    |
| log <sub>e</sub> (wave reflection index) ( $\times 10^{-2}$ ) | -119.3 (35.0)              | -120.2 (28.2) | -113.0 (33.1)            | -122.5 (27.3) | 8.7 (-0.0, 17.5)                              | 0.05    |

SBP=systolic blood pressure; DBP=diastolic blood pressure.

**Table S6.** Correlations of deseasonalized 25(OH)D concentration (baseline and change\*) with changes\* in arterial function measures in the vitamin D group

| Variable                                    | Correlation coefficient (95% confidence interval) <sup>†</sup> |                               |
|---------------------------------------------|----------------------------------------------------------------|-------------------------------|
|                                             | Baseline 25(OH) <sup>‡</sup>                                   | Change in 25(OH) <sup>§</sup> |
| Pulse rate                                  | -0.03 (-0.28, 0.21)                                            | 0.17 (-0.00, 0.33)            |
| Brachial SBP                                | 0.15 (-0.03, 0.34)                                             | -0.23 (-0.43, 0.01)           |
| Brachial DBP                                | 0.18 (-0.02, 0.36)                                             | -0.20 (-0.39, 0.02)           |
| Aortic SBP                                  | <b>0.21 (0.01, 0.42)</b>                                       | <b>-0.25 (-0.42, -0.02)</b>   |
| Aortic DBP                                  | 0.11 (-0.06, 0.28)                                             | -0.13 (-0.33, 0.10)           |
| Augmentation index                          | <b>0.18 (0.00, 0.34)</b>                                       | <b>-0.23 (-0.39, -0.06)</b>   |
| Pulse wave velocity                         | <b>0.22 (0.02, 0.40)</b>                                       | <b>-0.29 (-0.46, -0.08)</b>   |
| Peak reservoir pressure                     | <b>0.24 (0.07, 0.42)</b>                                       | <b>-0.31 (-0.48, -0.09)</b>   |
| Peak excess pressure                        | -0.12 (-0.32, 0.12)                                            | 0.17 (-0.04, 0.35)            |
| Reservoir pressure integral                 | 0.08 (-0.12, 0.29)                                             | <b>-0.29 (-0.44, -0.11)</b>   |
| log <sub>e</sub> (excess pressure integral) | -0.07 (-0.30, 0.17)                                            | 0.10 (-0.09, 0.28)            |
| Backward pressure amplitude                 | 0.18 (-0.05, 0.42)                                             | <b>-0.28 (-0.45, -0.06)</b>   |
| Forward pressure amplitude                  | <b>0.23 (0.02, 0.44)</b>                                       | <b>-0.28 (-0.43, -0.09)</b>   |
| log <sub>e</sub> (wave reflection index)    | 0.06 (-0.18, 0.29)                                             | -0.11 (-0.31, 0.10)           |

SBP=systolic blood pressure; DBP=diastolic blood pressure.

\*Follow-up minus baseline.

<sup>†</sup>Adjusted for age, sex and ethnicity.

<sup>‡</sup>Among those with baseline deseasonalized 25(OH)<65 nmol/L.

<sup>§</sup>Among those with baseline deseasonalized 25(OH)<50 nmol/L (vitamin D deficiency).
